# Supplementary material
Source: PubMed Central journal article supplement (PMC5411157)
Supplement: supp_pp.17.00222_PP2017-RA-00222R1_Supplemental_Tables.pdf [file supp_pp.17.00222_PP2017-RA-00222R1_Supplemental_Tables.pdf]

| amino acid         | ALD1 in vitro assay |                            |                                          |                               | in planta detection |
|--------------------|---------------------|----------------------------|------------------------------------------|-------------------------------|---------------------|
|                    | % in vitro activity | % trans-amination (30 min) | possible ketoacid / product              | in vitro detection of product |                     |
| L-Lys              | 100                 | 77.75 ± 6.58               | 2,3-DP                                   | yes                           | yes                 |
| L-Ala <sup>1</sup> | 0.7                 | 0.53 ± 0.16                | pyruvic acid                             | no                            | yes <sup>2</sup>    |
| L-Asp              | 0.1                 | 0.11 ± 0.01                | oxaloacetic acid                         | no                            | no                  |
| L-Tyr              | 0.3                 | 0.20 ± 0.05                | 4-hydroxy-phenyl pyruvic acid            | no                            | no                  |
| L-Ser              | 0.7                 | 0.58 ± 1.06                | (R)-3-hydroxy-2-oxobutanoic acid         | no                            | no                  |
| L-Thr              | 0.1                 | 0.05 ± 0.02                | hydroxypyruvic acid                      | no                            | no                  |
| L-Cys              | 1.2                 | 0.93 ± 0.36                | 3-mercapto-2-oxopropanoic acid           | no                            | no                  |
| Gly                | 0.01                | 0.01 ± 0.01                | glyoxylic acid                           | no                            | no                  |
| L-Pro              | 0.02                | 0.02 ± 0.01                | -                                        | no                            | no                  |
| L-Pip              | 0.3                 | 0.22 ± 0.05                | -                                        | no                            | no                  |
| L-Arg              | 60.0                | 46.65 ± 7.92               | 5-guanidino-2-oxopentanoic acid          | no <sup>3</sup>               | no <sup>3</sup>     |
| L-His              | 12.7                | 9.88 ± 1.06                | 3-(1H-imidazol-4-yl)-2-oxopropanoic acid | no <sup>3</sup>               | no <sup>3</sup>     |

**Supplemental Table S1.** ALD1 in vitro activity towards additional amino acids (compare Table 1 for experimental details).

<sup>1</sup> For L-Ala,  $\alpha$ -ketoglutarate was used as the acceptor oxoacid and Glu was quantified as the resulting product amino acid. For all other substrate amino acids, pyruvate was employed as the acceptor oxoacid and Ala quantified as the corresponding product amino acid.

<sup>2</sup> Pyruvate was detected to substantial and similar levels in both Col-0 wild-type and *ald1* mutant plants.

<sup>3</sup> The L-Arg- and L-His-derived transamination products could not be detected by the employed GC-MS-based methods.

| Gene                    | Primer name       | Primer sequence (5' to 3')                     | Usage                                                                       |
|-------------------------|-------------------|------------------------------------------------|-----------------------------------------------------------------------------|
| <i>ALD1</i>             | ALD1_p32_SP20_F1  | <u>TAT GAT</u> TCC CAA GGC TAG TTT<br>GGA CTT  | <b>pET32b cloning by sticky-end technique for fusion protein expression</b> |
|                         | ALD1_p32_SP20_F2  | TGA TTC CCA AGG CTA GTT TGG<br>ACT T           |                                                                             |
|                         | ALD1_p32_SP39_F1  | <u>TAT GGT</u> TCG GAA CGT GAA TTT<br>GGA GAA  |                                                                             |
|                         | ALD1_p32_SP39_F2  | <u>TGG TTC</u> GGA ACG TGA ATT TGG<br>AGA A    |                                                                             |
|                         | ALD1_p32_R1       | <u>G ATT</u> GGT ATT AGA AGT GGA AGA<br>GAG AT |                                                                             |
|                         | ALD1_p32_R2       | <u>TCGAG</u> ATT GGT ATT AGA AGT GGA<br>AGA G  |                                                                             |
| <i>SARD4</i>            | SARD4_p32b_F1     | <u>TAT GGC</u> TGC ATT ACC AGT ATT<br>CAT ACC  |                                                                             |
|                         | SARD4_p32b_F2     | <u>TGG CTG</u> CAT TAC CAG TAT TCA<br>TAC CA   |                                                                             |
|                         | SARD4_p32b_S42_F1 | <u>TAT GCA</u> AAA CTA CAC CGT TTC<br>ATC ACC  |                                                                             |
|                         | SARD4_p32b_S42_F2 | <u>TGC AAA</u> ACT ACA CCG TTT CAT<br>CAC CT   |                                                                             |
|                         | SARD4-p32b-R1     | GAC AAC GGC TGA GGT AAG TCT C                  |                                                                             |
|                         | SARD4-p32b-R2     | <u>TCGAG</u> AC AAC GGC TGA GGT AAG<br>T       |                                                                             |
| <i>CRYM (Isoform 1)</i> | CRYM_p32b_F1      | <u>TAT GAG</u> CCG GGT ACC AGC GTT             |                                                                             |
|                         | CRYM_p32b_F2      | <u>TGA GCC</u> GGG TAC CAG CGT TC              |                                                                             |
|                         | CRYM_p32b_R1      | <u>G TT</u> TAC CAG ATG ACC AGG AAT<br>CAT AG  |                                                                             |
|                         | CRYM_p32b_R2      | <u>TCGAG</u> TTT ACC AGA TGA CCA GGA<br>ATC    |                                                                             |
| <i>SARD4</i>            | GSP01F            | ATGATGACTGGTGGGTAGCAG                          | <b>Genotyping</b>                                                           |
|                         | GSP01R            | ATGTGAAATATTCGCAAACGC                          |                                                                             |
| <i>Actin2</i>           | Act2_for          | TCGCCATCCAAGCTGTTCTCT                          |                                                                             |
|                         | Act2_rev          | CCTGGACCTGCCTCATCATACTC                        |                                                                             |
| <i>SARD4</i>            | SARD4_qPCR_01F    | GTGTTTAAGTCCGTCGGTTCG                          | <b>qPCR</b>                                                                 |
|                         | SARD4_qPCR_01R    | AACGGCTGAGGTAAGTCTCG                           |                                                                             |
|                         | SARD4_qPCR_02F    | AAGGGCTCAGGAGTTAGCTG                           |                                                                             |
|                         | SARD4_qPCR_02R    | TCTAGCGAATCGTGGCTATCG                          |                                                                             |

**Supplemental Table S2.** List of primers used in this study.

| $\mu\text{g g}^{-1}$ FW | inoculated leaves (2 dpi) |                |
|-------------------------|---------------------------|----------------|
| amino acid              | $\mu\text{g g}^{-1}$ FW   |                |
|                         | MgCl <sub>2</sub>         | <i>Psm</i>     |
| Lys <sup>1</sup>        | 5.1 ± 1.1                 | 28.8 ± 11.7 ** |
| Leu <sup>1</sup>        | 3.3 ± 0.6                 | 49.2 ± 26.7 ** |
| Orn <sup>1</sup>        | 0.7 ± 0.1                 | 1.1 ± 0.2 *    |
| Met                     | 0.8 ± 0.1                 | 3.9 ± 1.0 **   |
| DAP                     | not detected              | not detected   |

**Supplemental Table S3.** Levels of free amino acids in the leaves of *Psm*-inoculated and mock-treated *Arabidopsis Col-0* plants.

Leaves were harvested 2 days after inoculation (dpi). Mean values are given in  $\mu\text{g g}^{-1}$  fresh weight (FW)  $\pm$  SD from a minimum of three replicate samples. Mock treatments were performed by infiltration of leaves with a 10 mM MgCl<sub>2</sub> solution. Asterisks denote statistically significant differences between *Psm*-inoculated and mock-treated samples (two-tailed *t* test; \*\*:  $P < 0.01$ , \*:  $P < 0.05$ ).

<sup>1</sup> taken from Návarová et al. (2012)
